# Supplementary material
Source: Springer Nature journal article supplement (https://www.springermedizin.de/resource/supplementary/12947_2007_179_MOESM2_ESM.pdf/9556398)

Map 3  
150dB/C2  
Persst Low  
Fr Rate High  
2D Opt:HRes

BW 0 Pg 0  
Col 0 Pg 0

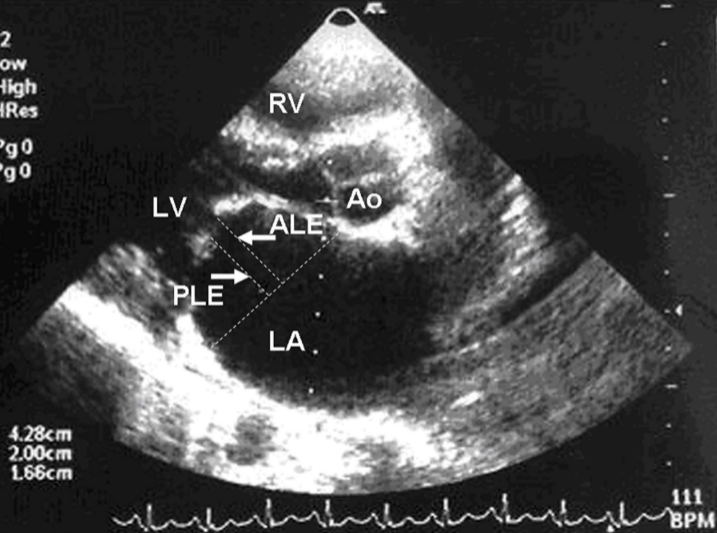

Supplement: MOESM2 [file 9556398]
